# Supplementary material
Source: publisher site journal article supplement (https://www.dovepress.com/article/470773)
Supplement: Supplementary file 1 [file get_supplementary_file.php]

**Supplementary table 1** Baseline clinical and laboratory for S-AKI group and non-SAKI group in training cohort

| Characteristic | S-AKI group(N=96) | Non-SAKI group (N=102) | *P* |
| --- | --- | --- | --- |
| Age (years) | 64(56,76) | 63(55,74) | 0.474 |
| Gender (%)  Male  Female | 66(68.8)  30(31.2) | 67(65.7)  35(34.3) | 0.646 |
| Smoking history | 54(56.3) | 37(36.3) | 0.283 |
| Drinking history | 42(43.8) | 43(42.2) | 0.821 |
| Hypertension (%)  Diabetes mellitus (%) | 55(57.3)  62(64.6) | 43(41.2)  25(24.5) | 0.937  0.094 |
| Cardiovascular disease (%) | 12(12.5) | 19(18.6) | 0.236 |
| MAP(mmHg) | 80(72,90) | 82(73,89) | 0.919 |
| Heart rate (bpm) | 99±17 | 96±15 | 0.200 |
| T (℃) | 37.2(36.7,37.7) | 37.2(36.6,37.7) | 0.902 |
| Laboratory tests |  |  |  |
| WBC (×109/L) | 13.13(7.85,16.73) | 11.76(7.45,15.10) | 0.195 |
| RBC(×1012/L) | 3.30(2.95,4.01) | 3.12(2.60,3.64) | 0.032* |
| Hb(g/L) | 101(84,118) | 93(82,109) | 0.107 |
| PLT(×109/L) | 135(67,197) | 118(76,156) | 0.392 |
| NEUT% (%) | 88.50(82.76,91.90) | 88.50(82.63,92.60) | 0.728 |
| LYM#(×109/L) | 0.83(0.53,1.14) | 0.88(0.66,1.25) | 0.077 |
| PLR | 169(121,193) | 145(120,159) | 0.000* |
| NLR | 12.10(7.69,22.18) | 10.65(7.30,17.02) | 0.075 |
| Cr(μmol/L) | 77.87(54.73,128.15) | 61.21(48.11,79.83) | 0.000* |
| BUN(mmol/L) | 11.20(7.40,15.18) | 8.30(5.90,13.70) | 0.012* |
| UA(μmol/L) | 235(167,341) | 191(120,296) | 0.032* |
| NGAL(ng/mL) | 173(117,237) | 104(74,107) | 0.000* |
| PT(s) | 16.40(14.30,19.18) | 15.30(13.88,17.63) | 0.055 |
| APTT(s) | 43.20(33.38,53.18) | 40.10(34.85,48.28) | 0.366 |
| Fib(g/L) | 3.77(2.65,4.50) | 3.82(2.74,5.53) | 0.297 |
| D-D(mg/L) | 4.24(2.12,11.91) | 4.06(2.16,7.50) | 0.675 |
| ALT(U/L) | 42(14,99) | 28(15,66) | 0.159 |
| AST(U/L) | 57(21,157) | 34(22,65) | 0.025* |
| ALB(g/L) | 30.6(27.1,34.4) | 30.9(27.0,34.6) | 0.755 |
| IL-6(pg/mL) | 171.8(81.9,667.4) | 120.2(42.0,326.9) | 0.036* |
| PCT(ng/mL) | 3.30(0.69,13.68) | 1.53(0.37,5.69) | 0.076 |
| PH | 7.40(7.31,7.47) | 7.42(7.35,7.47) | 0.359 |
| Lac(mmol/L) | 2.0(1.4,3.8) | 1.5(1.0,2.5) | 0.001* |
| APACHE II score | 20±8 | 19±8 | 0.359 |
| SOFA score | 8(5,12) | 7(5,9) | 0.013* |
| Mechanical ventilation, n (%) | 87(90.6) | 71(56.3) | 0.000* |
| Vasopressors use, n (%) | 79(82.3) | 55(53.9) | 0.000* |
| Hospital stay (days) | 17(10,27) | 13(6,22) | 0.033* |
| ICU stay (days) | 10(5,18) | 10(5,20) | 0.783 |

**Notes:**

**Abbreviations:** MAP: mean arterial pressure; T: temperature; WBC: white blood cell; RBC: red blood cell; Hb: Hemoglobin; NEUT%: neutrophil percentage; LYM#: Lymphocytes; PLR: platelet-to-lymphocyte ratio; NLR: neutrophil-to-lymphocyte ratio; Cr: creatinine; BUN: blood urea nitrogen; UA: uric acid; NGAL: neutrophil gelatinase-associated lipocalin; PT: partial thromboplastin time; APTT: activated partial thromboplastin time; FIB: fibrinogen; D-D: D-Dimer; ALT: alanine aminotransferase; AST: aspartate aminotransferase; ALB: albumin; IL-6: interleukin-6; PCT: serum procalcitonin; Lac: Lactate; APACHE II: acute physiology and chronic health evaluation II; SOFA, Sequential Organ Failure Assessment. * *P* < 0.05
